# Supplementary material for: Transcription-induced supercoiling explains formation of self-interacting chromatin domains in S. pombe
Source: Nucleic Acids Res. 2017 Aug 11;45(17):9850–9. doi: 10.1093/nar/gkx716 (PMC5622301; doi:10.1093/nar/gkx716)

**Figure S1.****Effects of the strength of torsional motors on the contact maps.**

The contact maps correspond to systems that only differ in the strength of torsional motors (0, 1, 2 or 4pN·nm, respectively). At the highest strength of torsional motors one observes clearly defined zones of contacts between neighbouring domains. When supercoiling is strong, individual domains are strongly compacted and each bead in a given domain has a similar probability of contacting a given bead in the neighbouring domain.

**Figure S2.****Physical presence of cohesin rings is not sufficient to generate formation of self-interacting domains.**

Magnified contact map from Figure 4 clearly shows the zones where contacts are depleted by localized cohesin rings, however, this did not result in formation of self-interacting domains.

**Video S1.****Video showing an intra-domain passage analysed in Figure 3.**

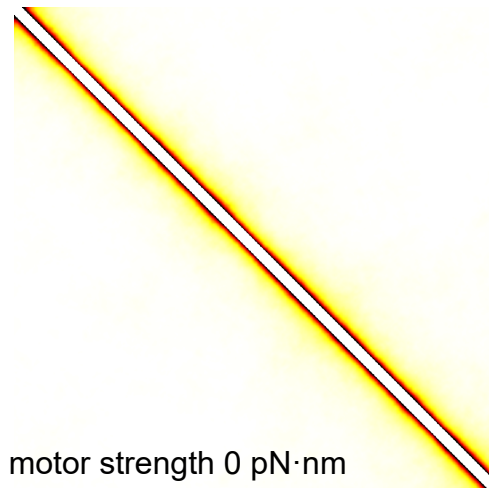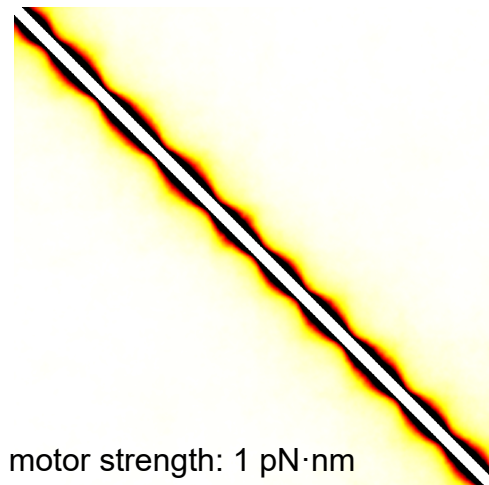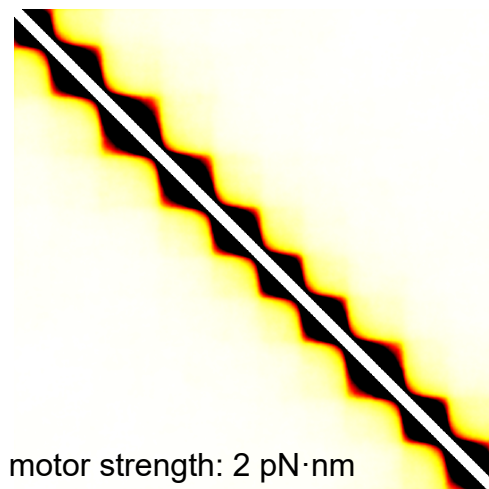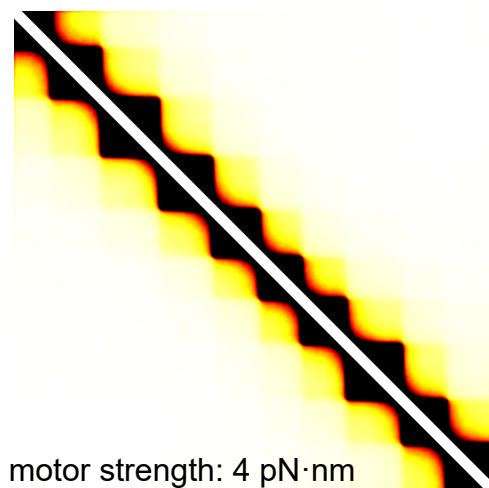

0 100 200 300 400 500 600 [kb]

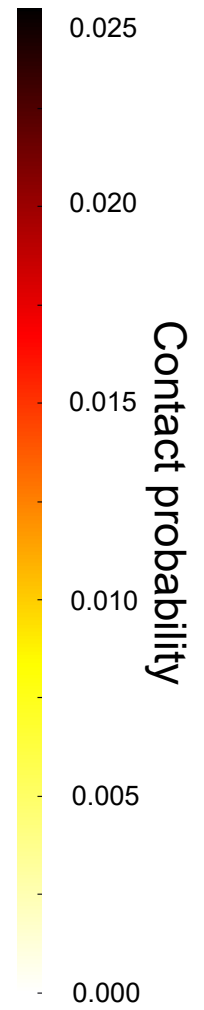

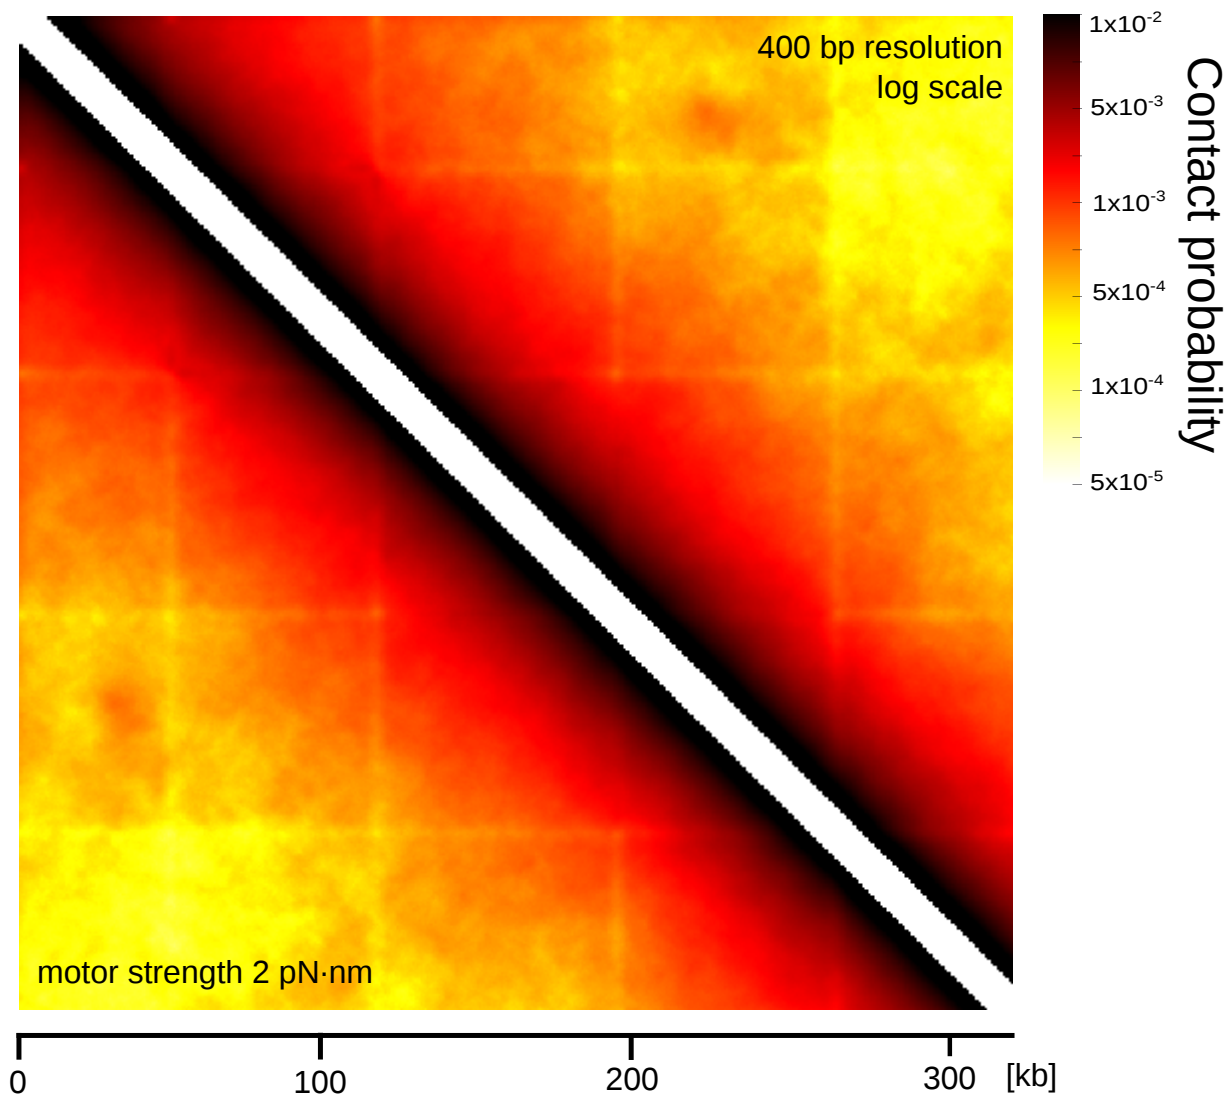

Supplement: Supplementary Data [file gkx716_supp.zip › nar-01875-n-2017-File006.pdf]
